# Supplementary material for: Structural switching from paramagnetic to single-molecule magnet behaviour of LnZn2 trinuclear complexes
Source: Royal Society of Chemistry journal article supplement (doi:10.1039/c5dt02965a), 2015-01-01
Supplement: c5dt02965a1.pdf [file c5dt02965a1.pdf]

Supporting Information

**Structural switching from paramagnetic to single-molecule magnet  
behaviour of LnZn<sub>2</sub> trinuclear complexes**

Poh Ling Then,<sup>a</sup> Chika Takehara,<sup>a</sup> Yumiko Kataoka,<sup>a</sup> Motohiro Nakano,<sup>b</sup> Tomoo Yamamura,<sup>c</sup> and Takashi Kajiwara\*<sup>a</sup>

*a* Faculty of Science, Nara Women's University, Nara, Nara 630-8506, Japan. Tel: +81-742-20-3402;  
E-mail: kajiwara@cc.nara-wu.ac.jp

*b* Graduate School of Science, Osaka University, Toyonaka, Osaka 560-0043, Japan.

*c* Institute for Materials Research, Tohoku University, Aoba-ku, Sendai, Miyagi 980-8577, Japan.

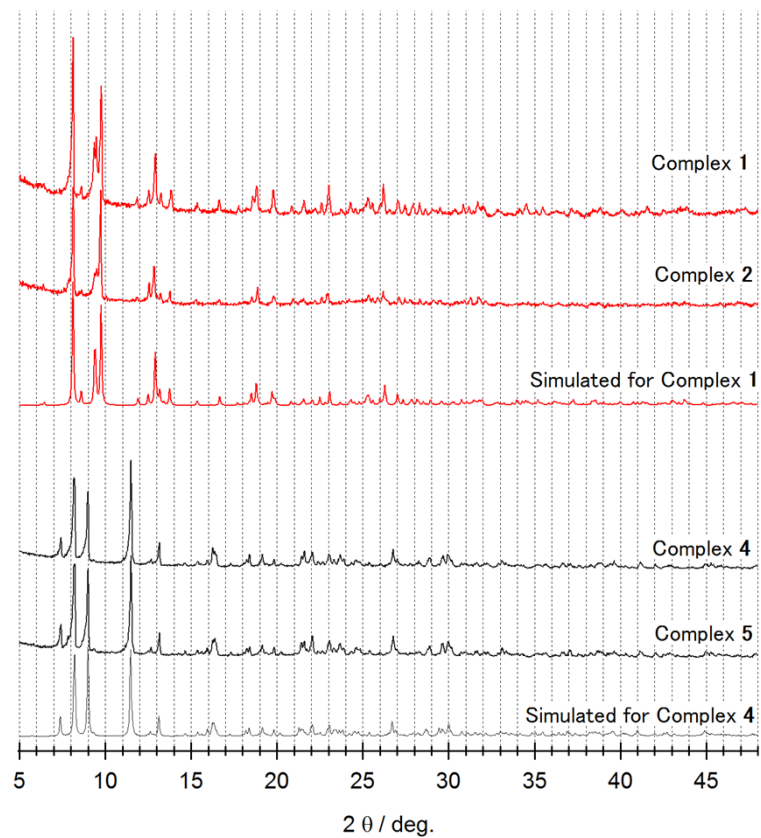

**Figure S1** Powder X-ray diffraction data collected for Tb<sup>III</sup> and Dy<sup>III</sup> complexes **1**, **2**, **4**, and **5** at room temperature. Simulated patterns were calculated on the basis of the single-crystal X-ray crystallography results of complexes **1** in type-B structure and **4** in type-A structure, respectively.

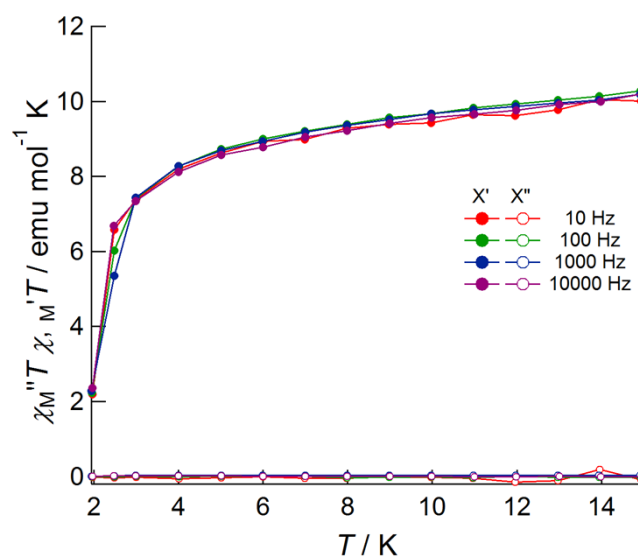

**Figure S2** Temperature dependence of the products of in-phase and out-of-phase molar susceptibilities  $\chi_M'$  and  $\chi_M''$  and temperature  $T$  of **1** measured under an oscillating field of 3 Oe with frequencies of 10, 100, 1000, and 10000 Hz under zero dc field.

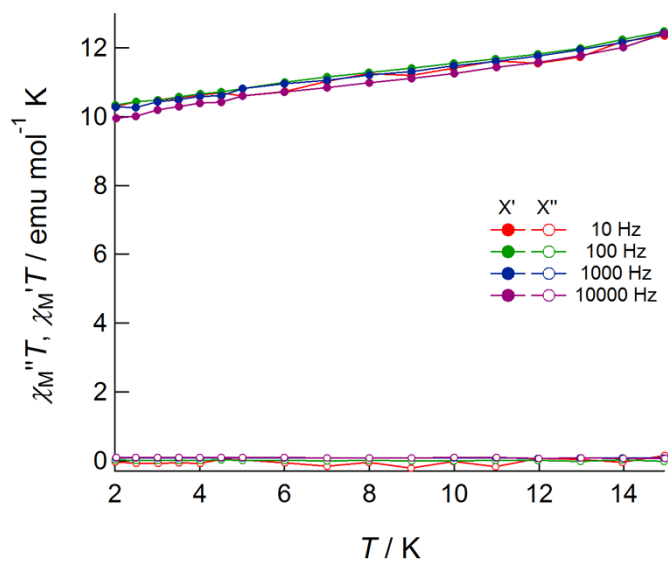

**Figure S3** Temperature dependence of the products of in-phase and out-of-phase molar susceptibilities  $\chi_M'$  and  $\chi_M''$  and temperature  $T$  of **2** measured under an oscillating field of 3 Oe with frequencies of 10, 100, 1000, and 10000 Hz under zero dc field

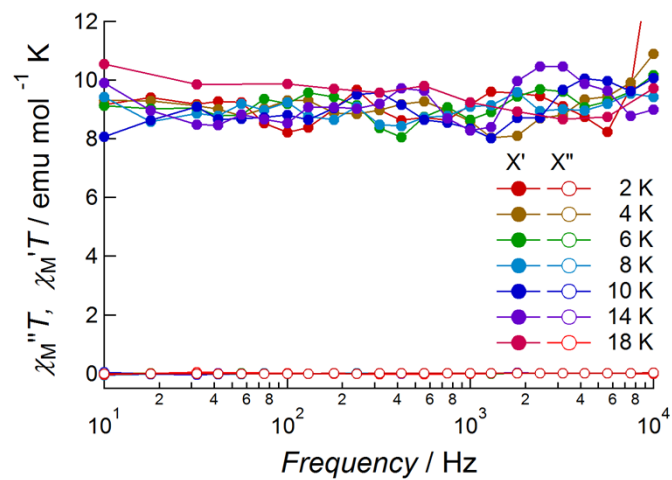

**Figure S4** Frequency dependence of products  $\chi_M' T$  (closed circle) and  $\chi_M'' T$  (open circle) of **4** measured at temperatures ranging from 2 to 18 K under an oscillating field of 3 Oe and an applied dc field of 0 Oe.

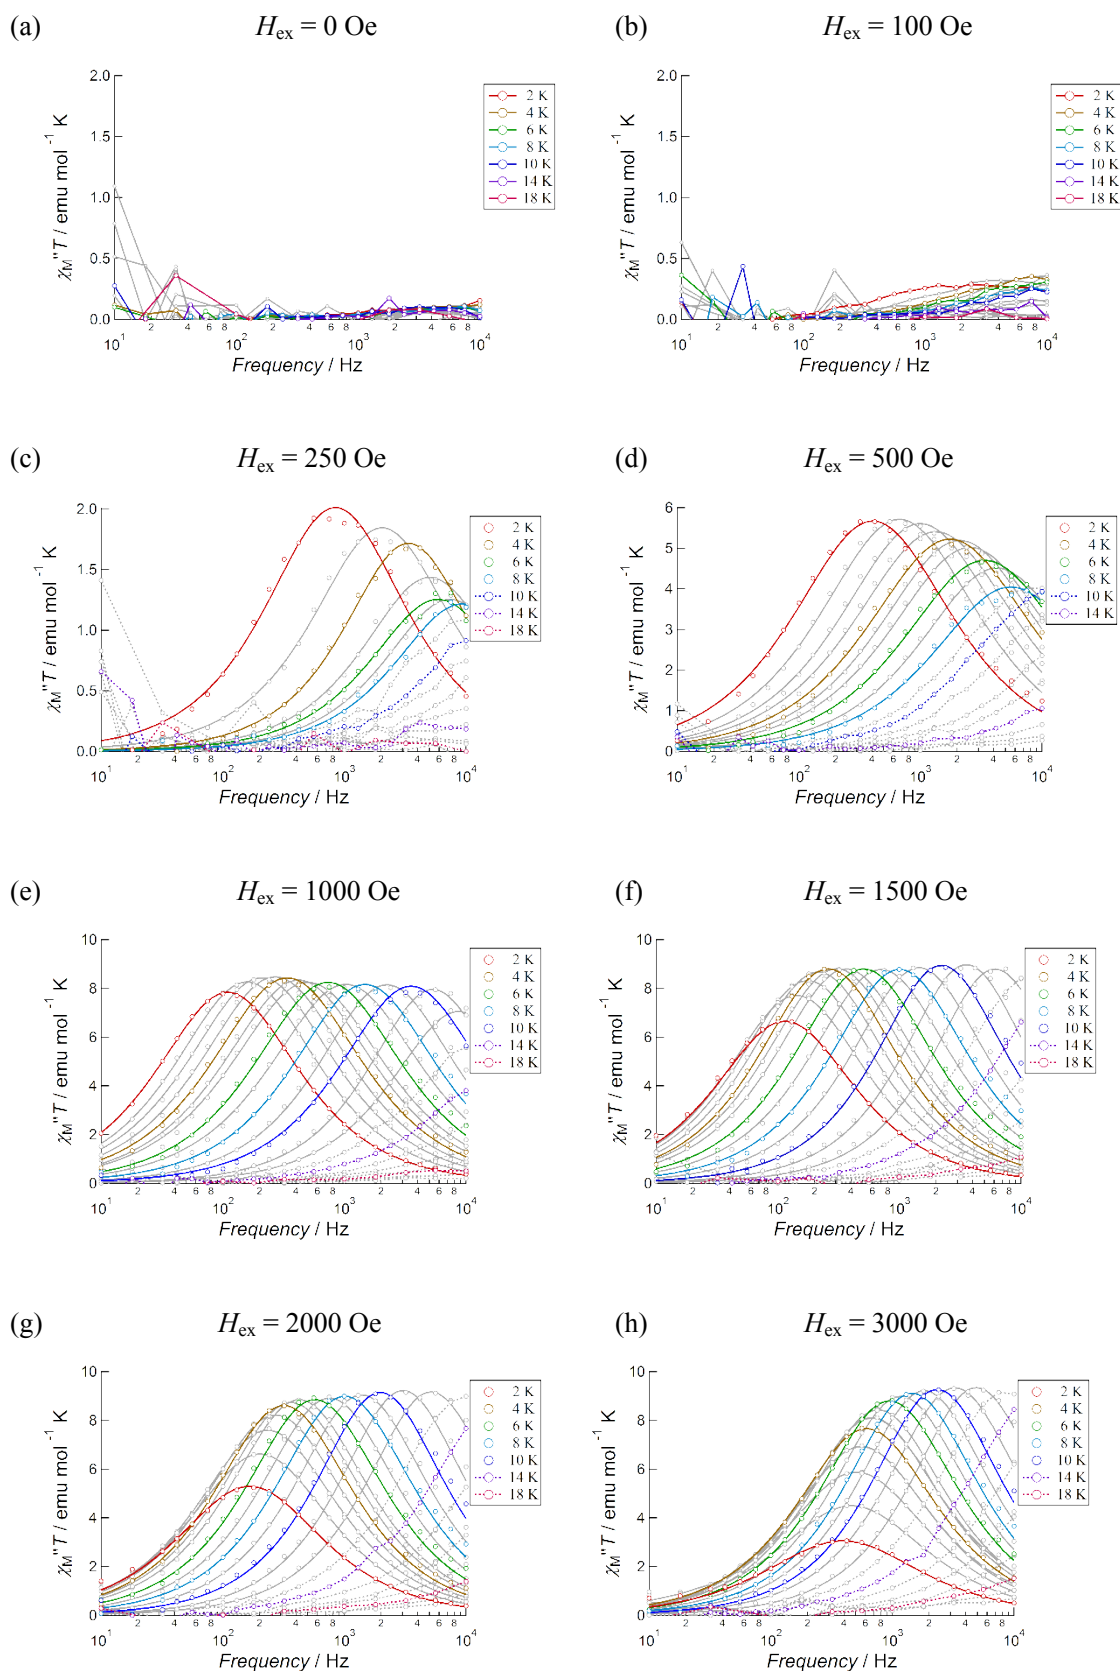

**Figure S5** Frequency dependence of the product of  $\chi_M''$  and temperature of **4**,  $\chi_M''T$ , measured under 0-3000 Oe dc field. Solid curves for (a) and (b) are the guide for eyes. Solid curves for others represent the results of fits to a generalized Debye model, while the dotted curves are the guide for eyes.

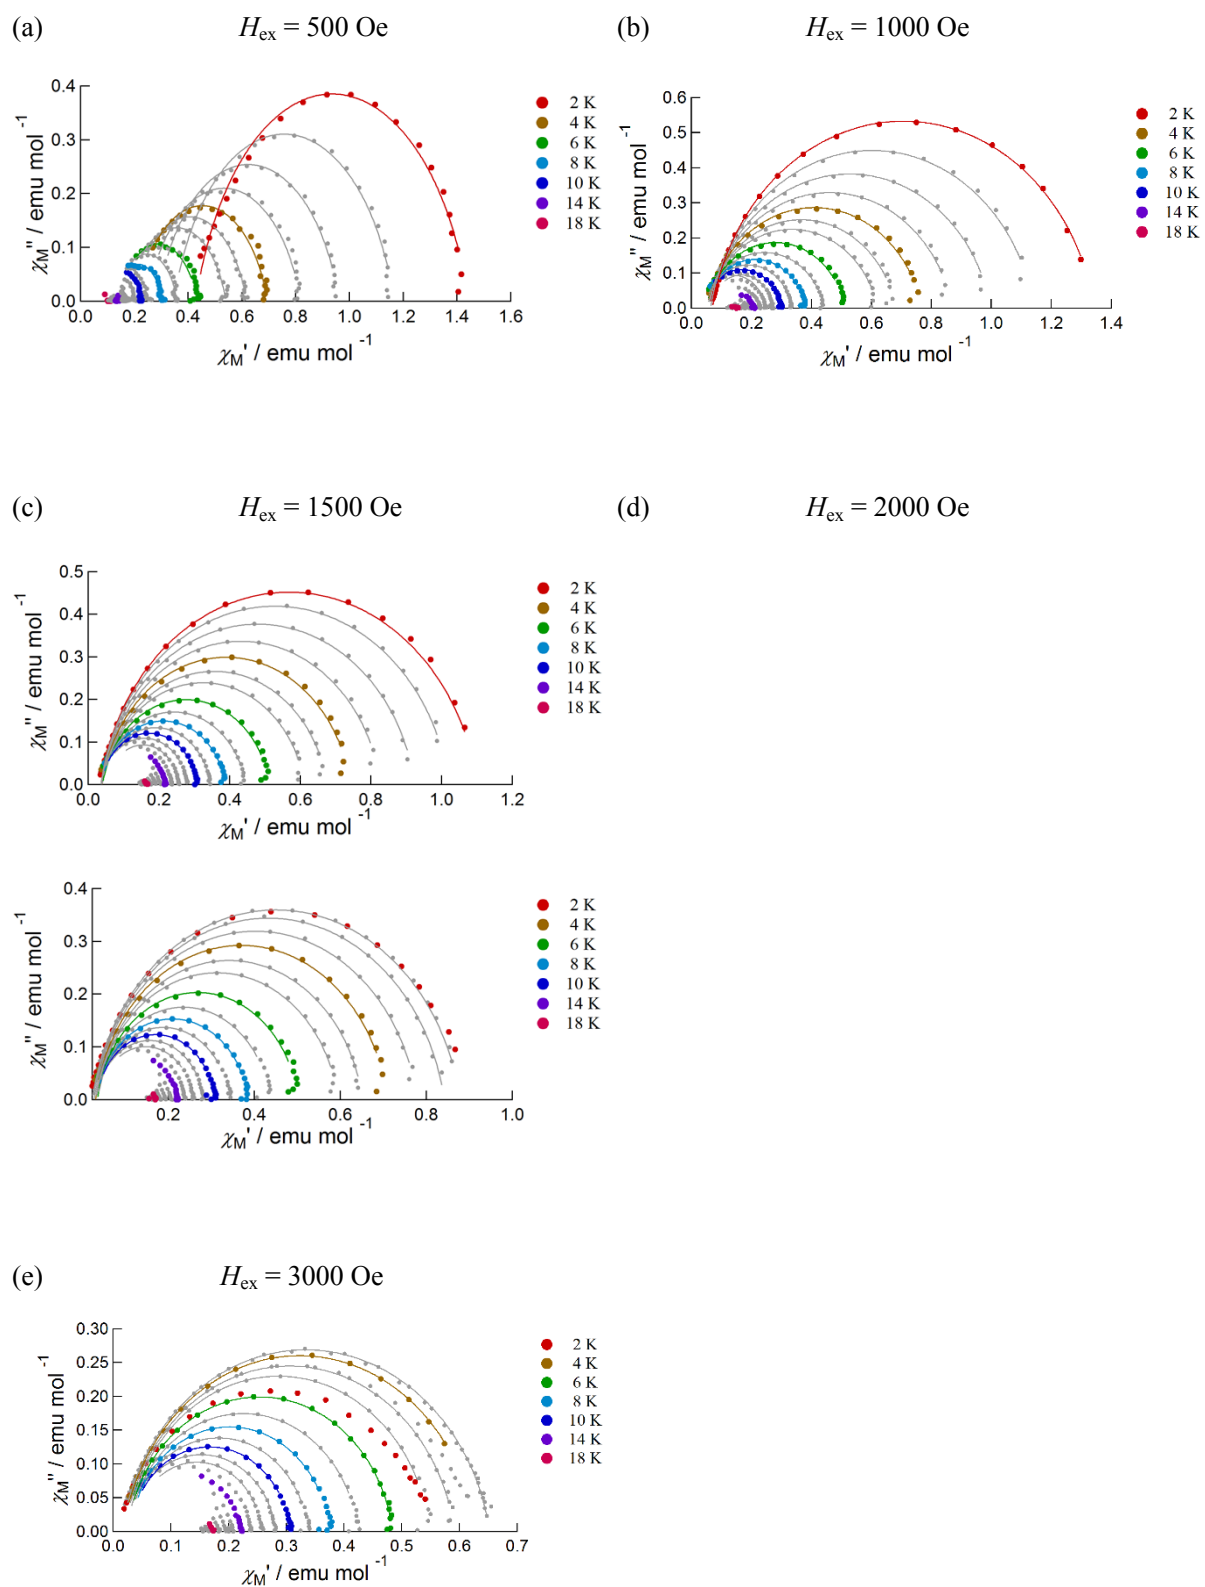

**Figure S6** Cole-Cole plots of **4** measured under the application of external 500-3000 Oe dc field. Solid curves represent theoretical calculations on the basis of the generalized Debye model.



**Table S1** Best fitted parameters of the extended Debye model for **4** under 1000 Oe dc field.

| $T/\text{K}$ | $\chi_T / \text{emu mol}^{-1}$ | $\chi_S / \text{emu mol}^{-1}$ | $\tau / \text{s}$ | $\alpha$  |
|--------------|--------------------------------|--------------------------------|-------------------|-----------|
| 2.0          | 9.891(15)                      | 0.259(7)                       | 0.001447(6)       | 0.113(2)  |
| 2.5          | 8.41(4)                        | 0.47(2)                        | 0.001010(12)      | 0.116(7)  |
| 3.0          | 7.35(3)                        | 0.42(2)                        | 0.000767(8)       | 0.132(6)  |
| 3.5          | 6.40(4)                        | 0.40(3)                        | 0.0005907(10)     | 0.136(10) |
| 4.0          | 5.65(4)                        | 0.38(4)                        | 0.000469(11)      | 0.141(13) |
| 4.5          | 5.03(4)                        | 0.38(4)                        | 0.000378(9)       | 0.143(15) |
| 5.0          | 4.58(3)                        | 0.35(4)                        | 0.000317(7)       | 0.156(12) |
| 6.0          | 3.76(4)                        | 0.37(5)                        | 0.000216(8)       | 0.13(2)   |
| 7.0          | 3.26(3)                        | 0.33(3)                        | 0.000155(3)       | 0.145(11) |
| 8.0          | 2.804(14)                      | 0.34(4)                        | 0.000108(3)       | 0.120(15) |
| 9.0          | 2.456(13)                      | 0.35(3)                        | 0.0000710(19)     | 0.096(12) |
| 10.0         | 2.214(8)                       | 0.27(5)                        | 0.000045(2)       | 0.115(16) |
| 11.0         | 1.975(7)                       | 0.40(2)                        | 0.0000298(8)      | 0.054(8)  |
| 12.0         | 1.817(14)                      | 0.472(13)                      | 0.0000181(4)      | 0.086(5)  |

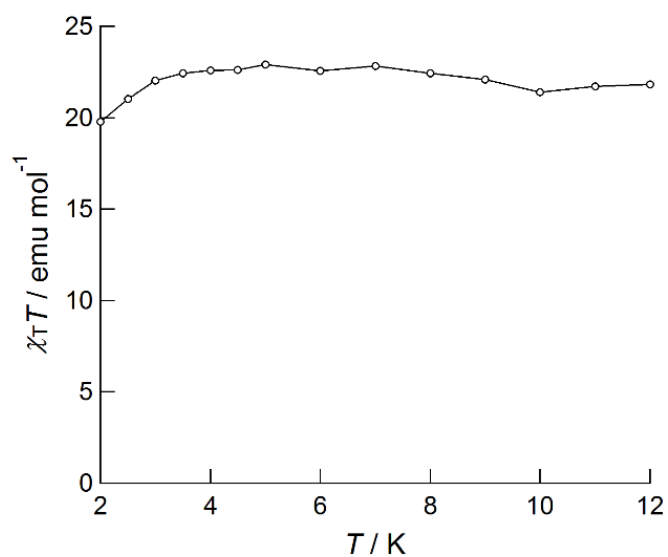

**Figure S7** Temperature dependence of the product of the isothermal susceptibility  $\chi_T$  and temperature  $T$  of **4** measured under 1000 dc field.



### Detail of the Arrhenius analysis considering four relaxation processes

Both field and temperature dependence of  $\tau^{-1}$  was analysed by equation 1.

$$\begin{aligned} 1/\tau(H,T) &= 1/\tau_{\text{Direct}}(H,T) + 1/\tau_{\text{Tunnel}}(H) + 1/\tau_{\text{Raman}}(T) + 1/\tau_{\text{TA-QTM}}(T) \\ &= A_1 H^2 T + A_2 H^4 T + \frac{B_1}{1 + B_2 H^2} + CT^n + \tau_0^{-1} \exp(-\Delta E/k_B T) \end{aligned} \quad (1)$$

In this equation, the first and second terms on the right side denote a direct process, the third term denotes the resonance tunnelling process, and the fourth and fifth terms represent the Raman and TA-QTM processes, respectively. To individually analyse the field and temperature dependence of  $\tau^{-1}$ ,  $T$  or  $H$  was fixed at the values of  $T_1$  K or  $H_1$  Oe to derive the following equations:

$$\tau(H, T_1)^{-1} = (A_1 H^2 + A_2 H^4) T_1 + \frac{B_1}{1 + B_2 H^2} + D_1 \quad (S1)$$

and

$$\tau(H_1, T)^{-1} = D_2 T + CT^n + \tau_0^{-1} \exp(-\Delta E/k_B T) + D_3 \quad (S2)$$

Here, constants  $D_1$ ,  $D_2$ , and  $D_3$  are expressed as

$$D_1 = CT_1^n + \tau_0^{-1} \exp(-\Delta E/k_B T_1) \quad (S3)$$

$$D_2 = A_1 H_1^2 + A_2 H_1^4 \quad (S4)$$

and

$$D_3 = \frac{B_1}{1 + B_2 H_1^2} \quad (S5)$$

The expected value of  $n$  is 7 for non-Kramers ions, 9 for Kramers ions, and 5 when two or more ground pairs of sub-levels are closely located or are degenerate.<sup>16a</sup> In this analysis,  $n$  was initially fixed at 7. Constant  $D_1$  is independent of the field, while constants  $D_2$  and  $D_3$  are independent of temperature; however, they depend on each other in equation 1 and cannot be simultaneously estimated. Hence, a self-consistent analysis was employed to obtain the values of seven parameters of  $A_1$ ,  $A_2$ ,  $B_1$ ,  $B_2$ ,  $C$ ,  $\tau_0$ , and  $\Delta E/k_B$ .  $D_1$  would be small at the lowest temperature ( $T_1 = 2.0$  K); hence, we first assumed  $D_1$  to be 0 for the analysis of the field dependence of  $\tau^{-1}$  at 2.0 K to obtain the values of four parameters of  $A_1$ ,  $A_2$ ,  $B_1$ , and  $B_2$  (Fig. 7 in main text). Using these values, constants  $D_2$  and  $D_3$  were calculated, and the temperature dependence of  $\ln(\tau/s)$  (Fig. 6 in main text,  $H_1 = 1000$  Oe) was analyzed on the basis of equation S2, which gave values of three parameters of  $C$ ,  $\tau_0^{-1}$ , and  $\Delta E/k_B$ . Using the resultant values,  $D_1$  was modified, and the field dependence of  $\tau^{-1}$  was analyzed again to achieve better values for  $A_1$ ,  $A_2$ ,  $B_1$ , and  $B_2$ , and these cycles were repeated until all parameters became consistent.

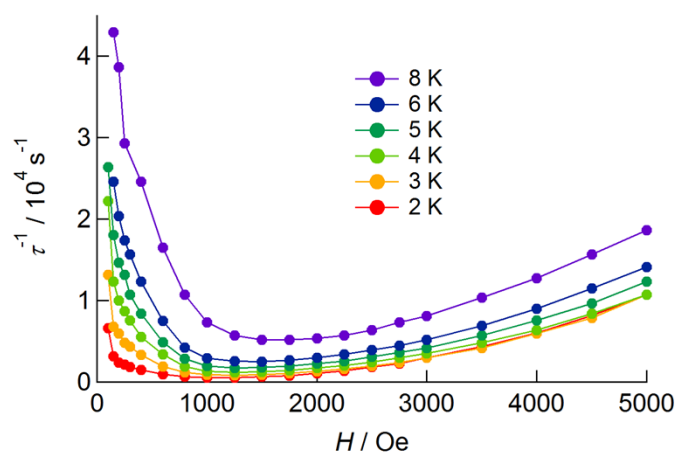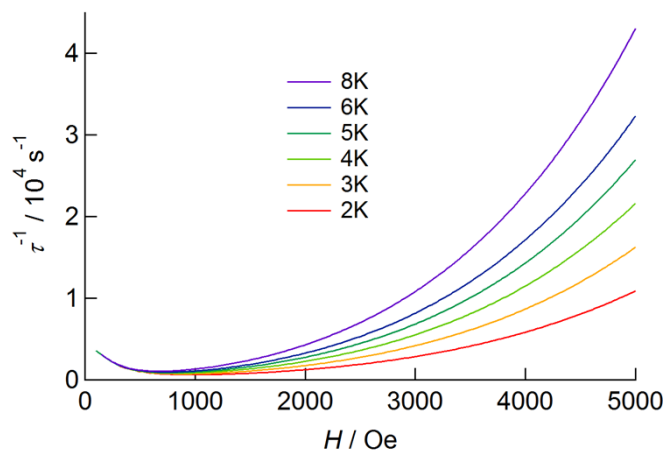

**Figure S8** Dc field dependence of the relaxation rate  $\tau^{-1}$  of **4** measured at several temperatures ranging from 2 K to 8 K. Top) observed data. Bottom) theoretical curves on the basis of the parameters of  $A_1 = 1.1(6) \times 10^{-5} \text{ s}^{-1} \text{ Oe}^{-2} \text{ K}^{-1}$ ,  $A_2 = 4.2(3) \times 10^{-12} \text{ s}^{-1} \text{ Oe}^{-4} \text{ K}^{-1}$ ,  $B_1 = 3.9(4) \times 10^3 \text{ s}^{-1}$ ,  $B_2 = 1.5(3) \times 10^{-5} \text{ Oe}^{-2}$ ,  $C = 14.3(8) \times 10^{-4} \text{ K}^{-7} \text{ s}^{-1}$ ,  $\Delta E/k_B = 8.8(4) \text{ K}$ ,  $\tau_0 = 7.1(7) \times 10^{-5} \text{ s}$ , and  $n = 7$ .

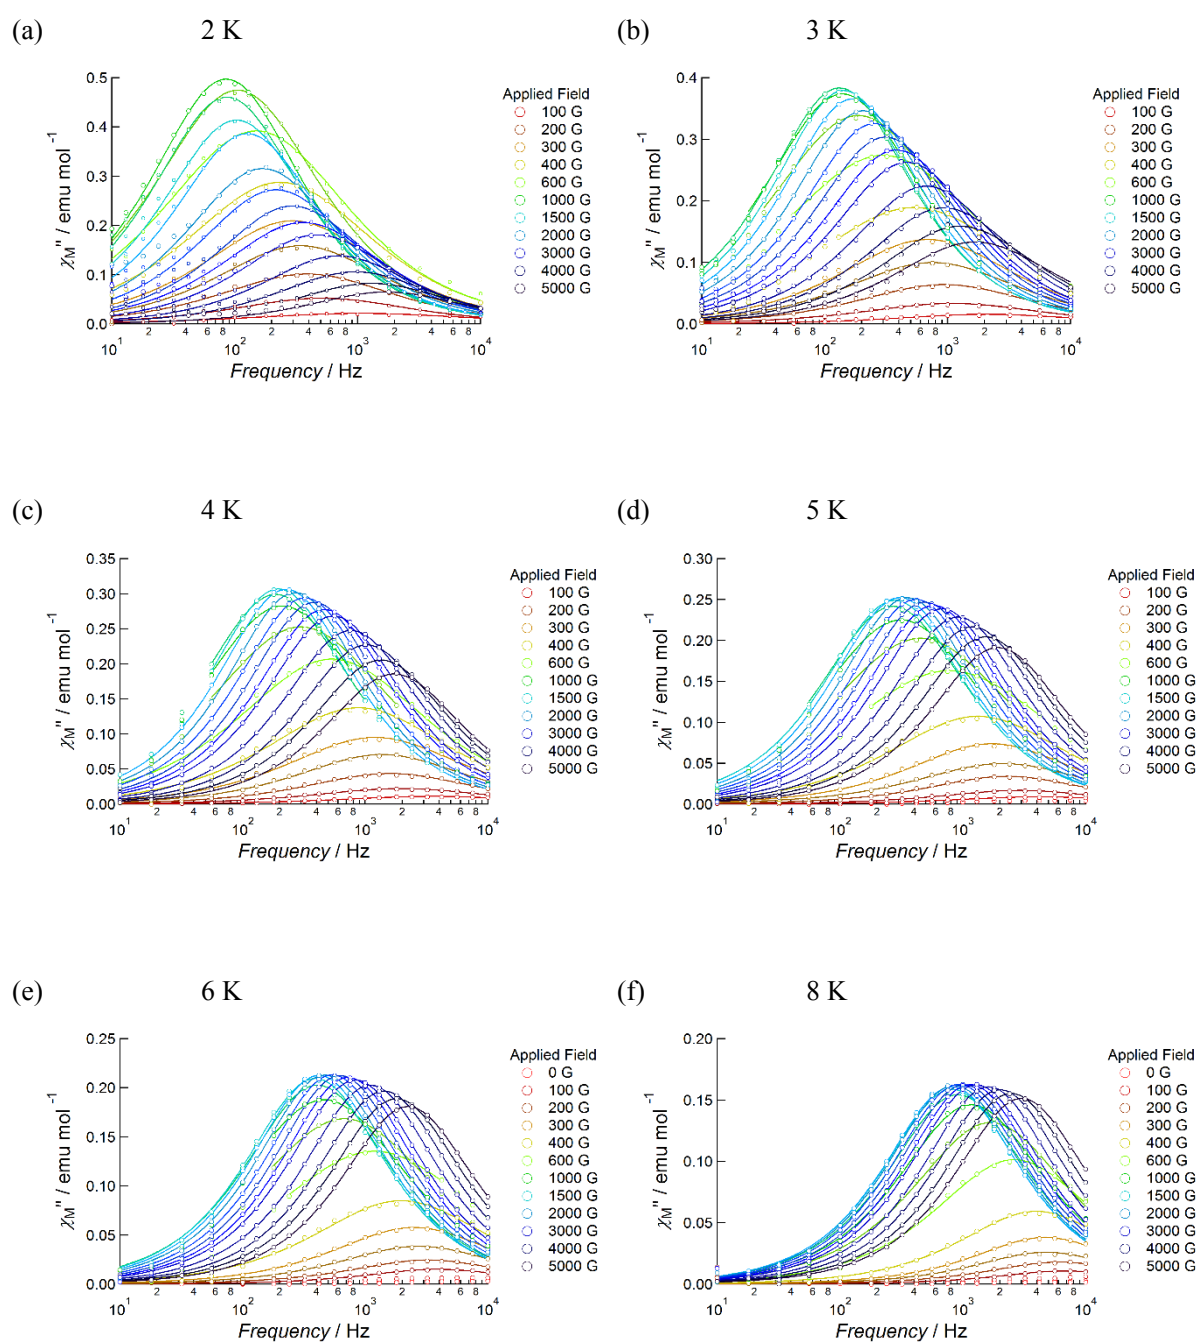

**Figure S9** Dc field dependence of the  $\chi_M''$  of **4** measured at several temperatures ranging from 2 K to 8 K. Solid curves represent the results of fits to a generalized Debye model.

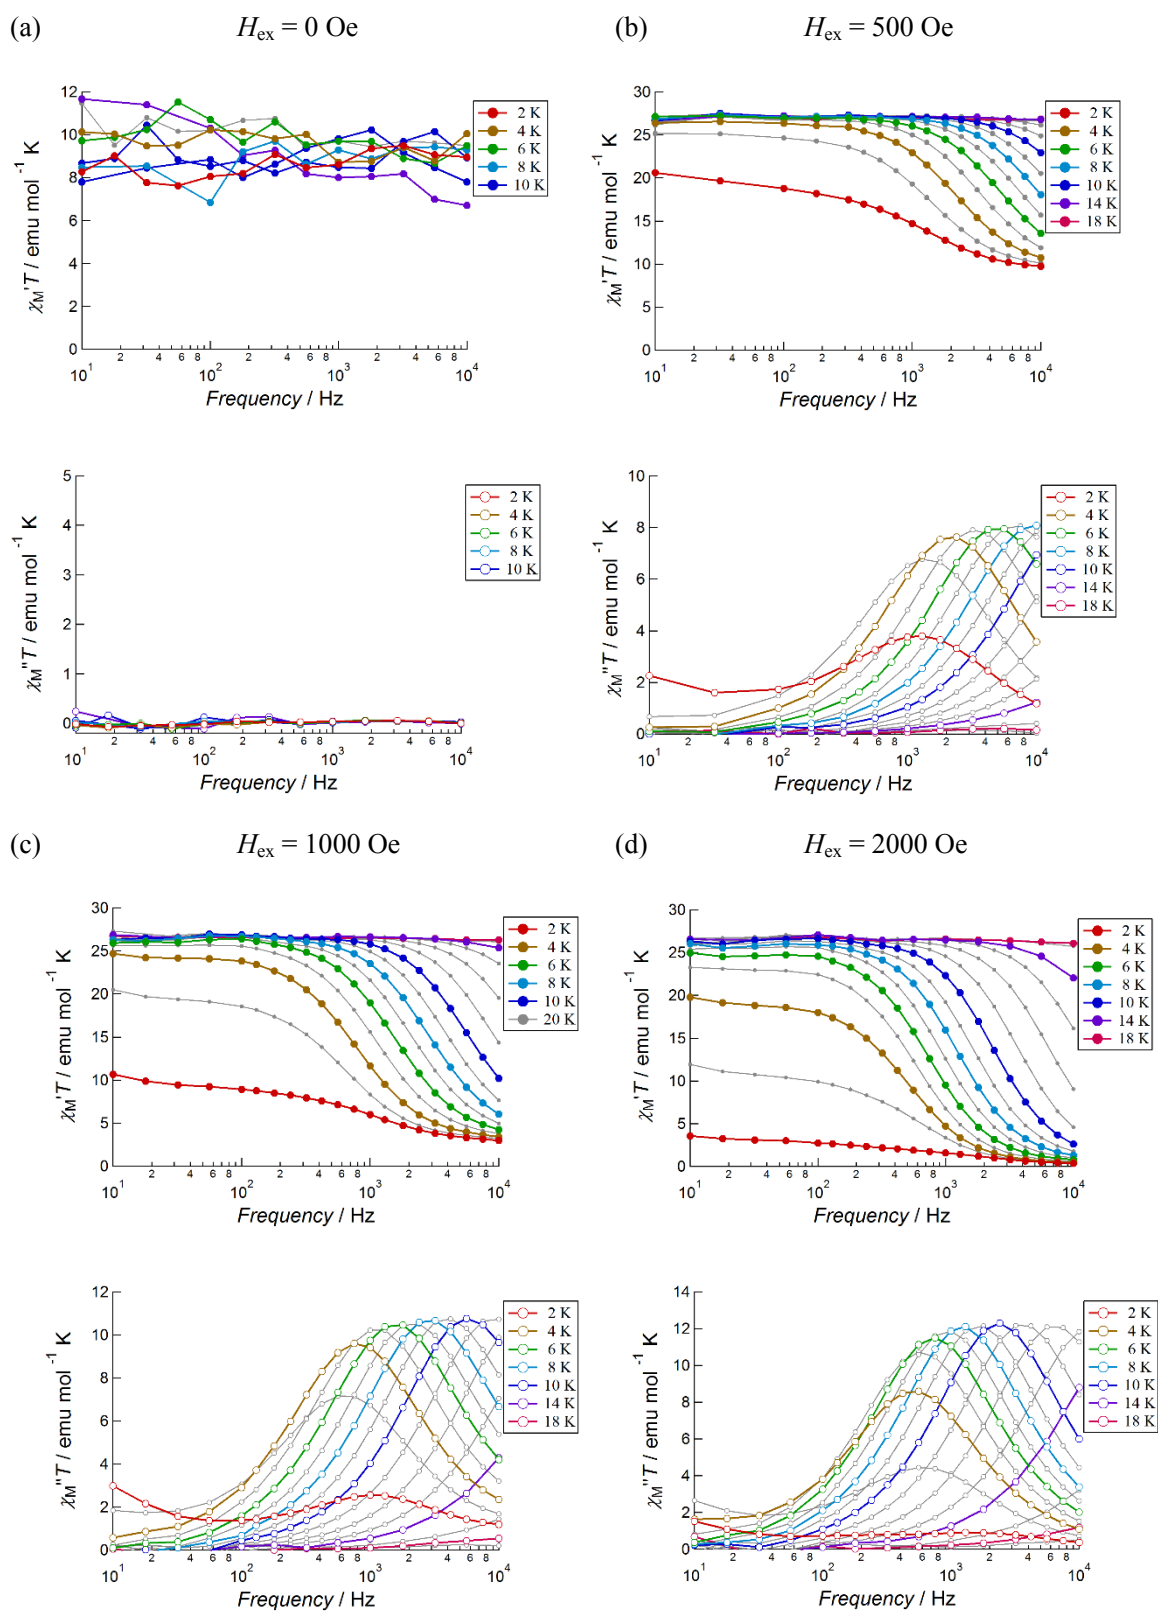

**Figure S10** Frequency dependence of the products of  $\chi_M' T$  (closed circles) and  $\chi_M'' T$  (open circles) of  $[\text{Tb}(\text{NO}_3)\{\text{Zn}(\text{L})(\text{SCN})\}_2]$  ( $4'$ ) in type-A structure, measured under 0-2000 Oe dc field. Solid curves are the guide for eyes.

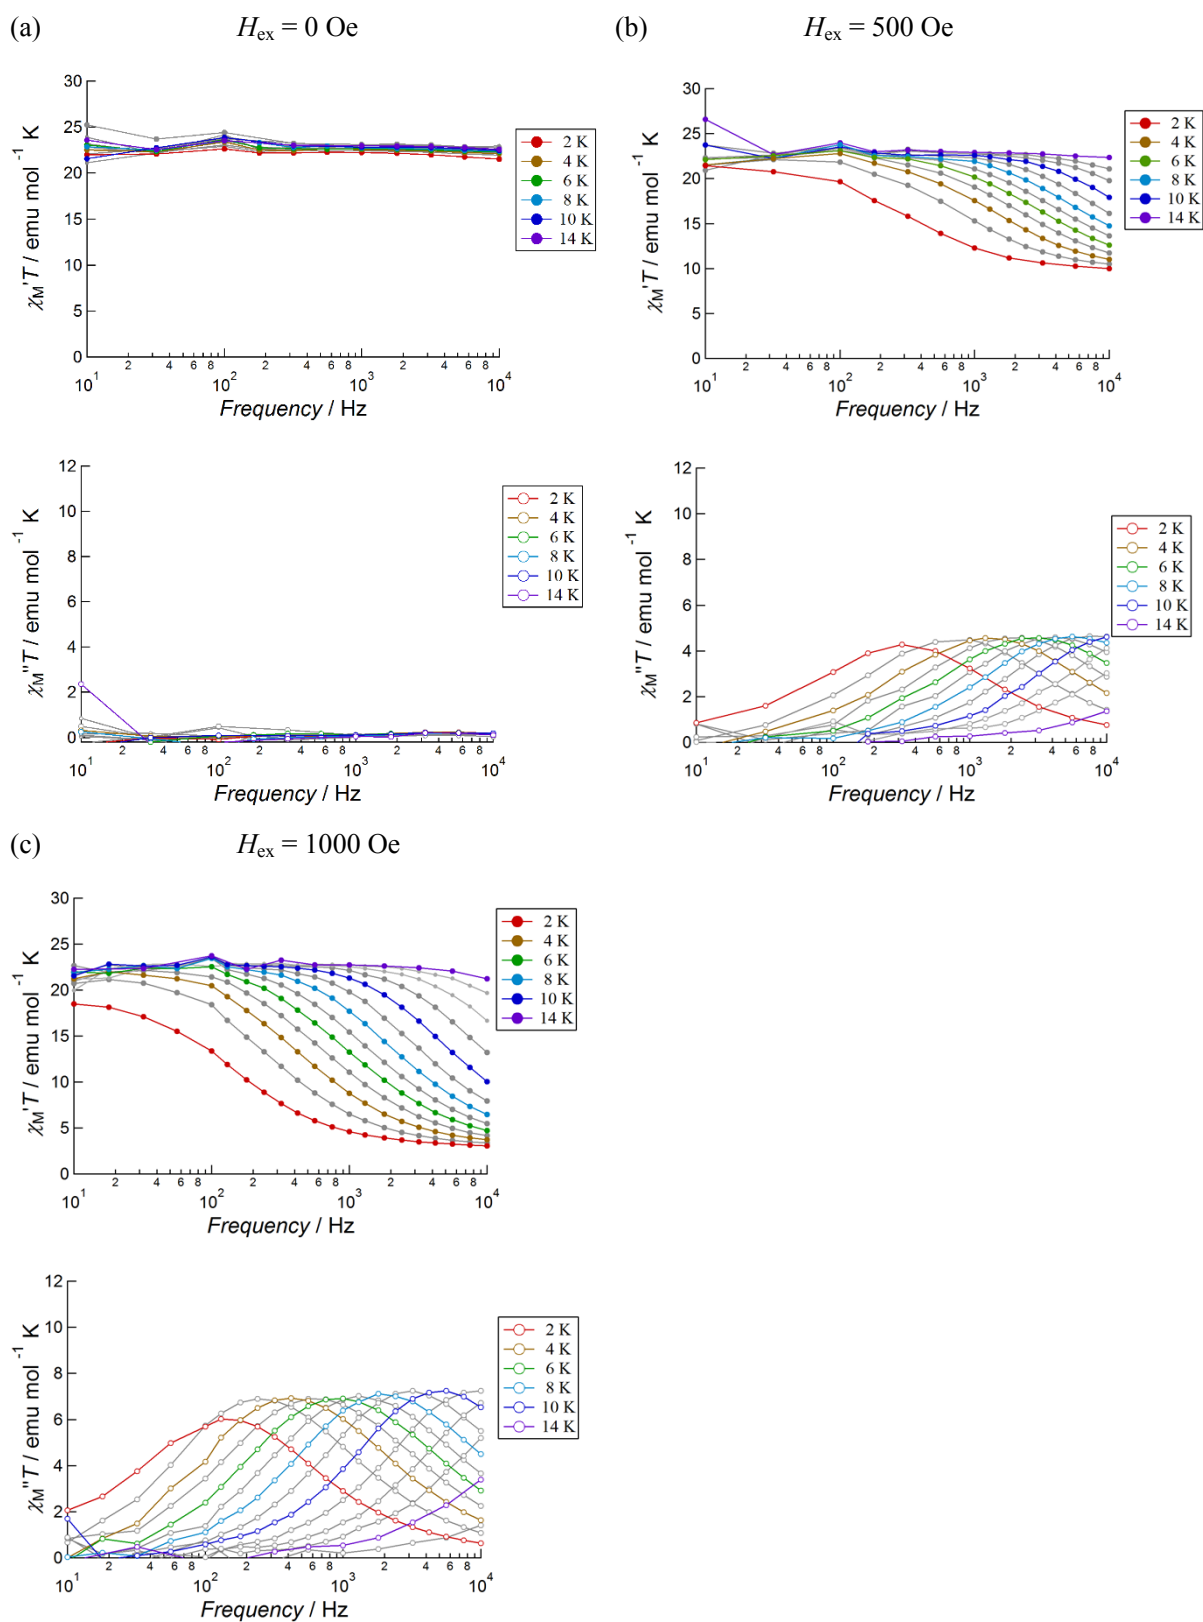

**Figure S11** Frequency dependence of the products of  $\chi_M'T$  (closed circles) and  $\chi_M''T$  (open circles) of  $[\text{Tb}_{0.07}\text{La}_{0.93}(\text{NO}_3)\{\text{Zn}(\text{L})(\text{SCN})\}_2]$  ( $4''$ ) in type-A structure, measured under 0-1000 Oe dc field. Solid curves are the guide for eyes.

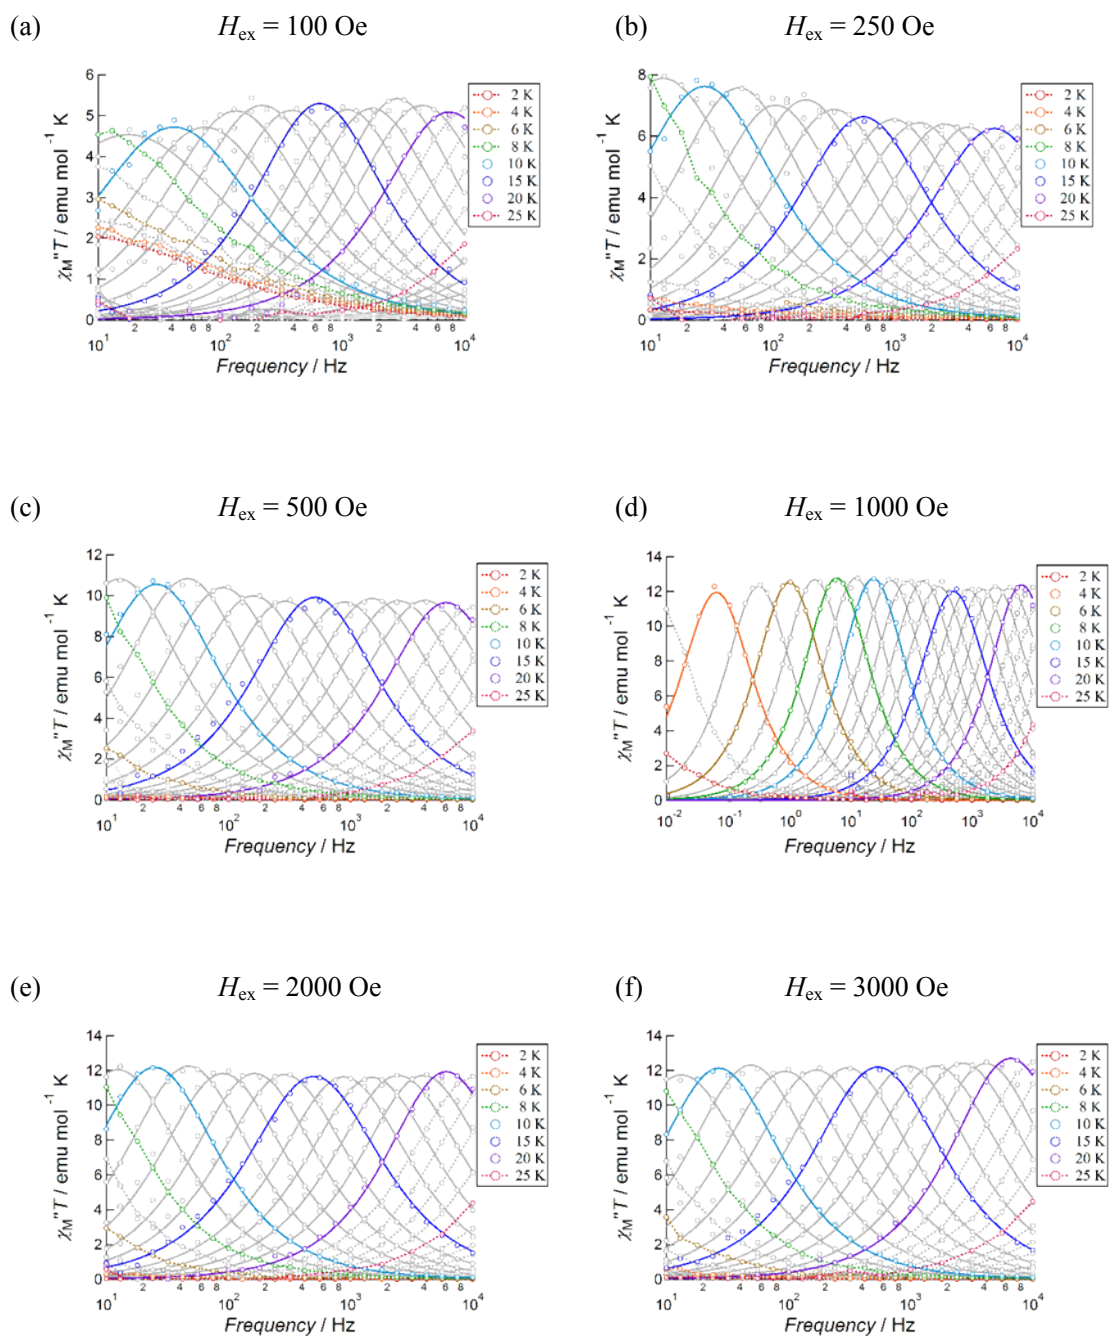

**Figure S12** Frequency dependence of the product of  $\chi_M''$  and temperature of **5**,  $\chi_M''T$ , measured under 250-3000 Oe dc field. Solid curves represent the results of fits to a generalized Debye model, while the dotted curves are the guide for eyes.

(a)  $H_{\text{ex}} = 0 \text{ Oe}$

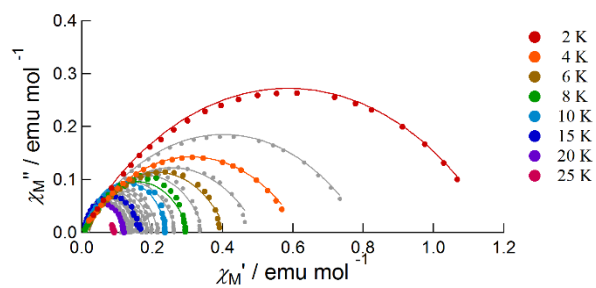

(b)  $H_{\text{ex}} = 100 \text{ Oe}$

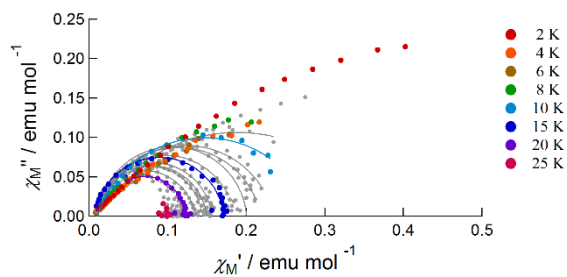

(c)  $H_{\text{ex}} = 250 \text{ Oe}$

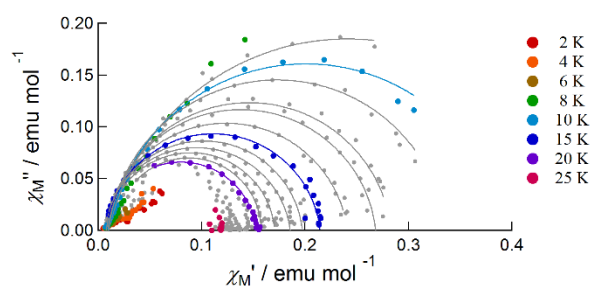

(d)  $H_{\text{ex}} = 500 \text{ Oe}$

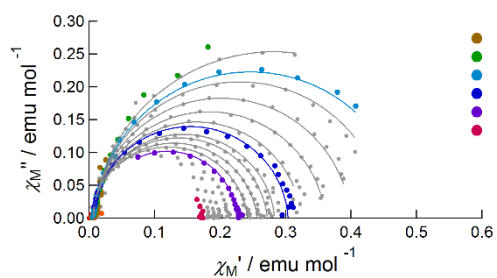

(e)  $H_{\text{ex}} = 1000 \text{ Oe}$

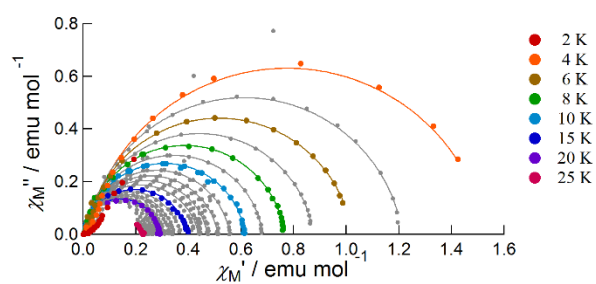

(f)  $H_{\text{ex}} = 2000 \text{ Oe}$

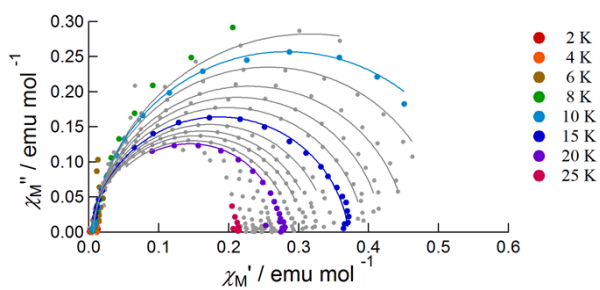

(g)  $H_{\text{ex}} = 3000 \text{ Oe}$

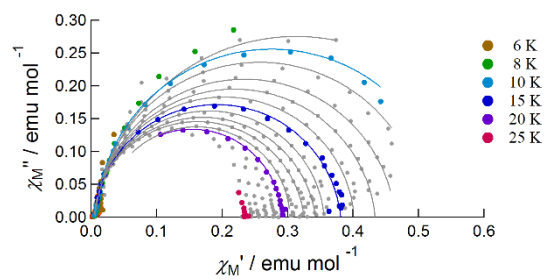

**Figure S13** Cole-Cole plots of **5** measured under the application of external 0-3000 Oe dc field. Solid curves represent theoretical calculation on the basis of the generalized Debye model.



**Table S2** Best fitted parameters of the extended Debye model for **5** under 0 Oe dc field.

| $T/K$ | $\chi_T / \text{emu mol}^{-1}$ | $\chi_S / \text{emu mol}^{-1}$ | $\tau / \text{s}$ | $\alpha$   |
|-------|--------------------------------|--------------------------------|-------------------|------------|
| 2.0   | 5.560(14)                      | 0 *                            | 0.0442(4)         | 0.4455(15) |
| 3.0   | 3.819(10)                      | 0 *                            | 0.0405(3)         | 0.4516(11) |
| 4.0   | 2.958(15)                      | 0.0085(19)                     | 0.0367(4)         | 0.452(3)   |
| 5.0   | 2.38(3)                        | 0.05(2)                        | 0.0298(9)         | 0.412(9)   |
| 6.0   | 1.96(3)                        | 0.08(2)                        | 0.0231(7)         | 0.335(15)  |
| 7.0   | 1.65(2)                        | 0.09(2)                        | 0.0151(5)         | 0.257(16)  |
| 8.0   | 1.427(15)                      | 0.10(2)                        | 0.0090(3)         | 0.190(9)   |
| 9.0   | 1.259(10)                      | 0.100(15)                      | 0.00516(12)       | 0.136(12)  |
| 10.0  | 1.131(6)                       | 0.088(13)                      | 0.00316(6)        | 0.104(10)  |
| 11.0  | 1.021(12)                      | 0.049(10)                      | 0.00176(5)        | 0.137(17)  |
| 12.0  | 0.933(8)                       | 0.051(8)                       | 0.00107(3)        | 0.102(15)  |
| 13.0  | 0.875(4)                       | 0.042(4)                       | 0.000659(10)      | 0.100(8)   |
| 14.0  | 0.810(3)                       | 0.039(4)                       | 0.000394(6)       | 0.078(8)   |
| 15.0  | 0.778(11)                      | 0.030(7)                       | 0.000241(7)       | 0.085(18)  |
| 16.0  | 0.748(8)                       | 0.028(15)                      | 0.000146(4)       | 0.112(16)  |
| 17.0  | 0.690(7)                       | 0.025(10)                      | 0.000087(3)       | 0.040(2)   |
| 18.0  | 0.659(8)                       | 0.036(13)                      | 0.000056(4)       | 0.061(12)  |
| 19.0  | 0.595(10)                      | 0.021(7)                       | 0.0000353(6)      | 0.038(6)   |
| 20.0  | 0.565(2)                       | 0.017(6)                       | 0.0000216(13)     | 0.063(5)   |

\* fixed at 0 emu mol<sup>-1</sup>

**Table S3** Best fitted parameters of the extended Debye model for **5** under 1000 Oe dc field.

| <i>T</i> /K | $\chi_T$ / emu mol <sup>-1</sup> | $\chi_S$ / emu mol <sup>-1</sup> | $\tau$ / s    | $\alpha$  |
|-------------|----------------------------------|----------------------------------|---------------|-----------|
| 4.0         | 7.27(7)                          | 0.076(9)                         | 2.63(6)       | 0.119(8)  |
| 5.0         | 5.75(4)                          | 0.062(13)                        | 0.527(5)      | 0.094(5)  |
| 6.0         | 4.83(4)                          | 0.060(10)                        | 0.1654(18)    | 0.086(6)  |
| 7.0         | 4.13(2)                          | 0.053(10)                        | 0.0628(7)     | 0.077(5)  |
| 8.0         | 3.618(15)                        | 0.047(10)                        | 0.0273(3)     | 0.072(5)  |
| 9.0         | 3.226(15)                        | 0.042(12)                        | 0.01319(12)   | 0.074(6)  |
| 10.0        | 2.909(15)                        | 0.030(14)                        | 0.00678(7)    | 0.079(6)  |
| 11.0        | 2.63(2)                          | 0.023(18)                        | 0.00350(5)    | 0.083(9)  |
| 12.0        | 2.42(2)                          | 0.013(8)                         | 0.00187(3)    | 0.089(9)  |
| 13.0        | 2.23(2)                          | 0 *                              | 0.00102(2)    | 0.090(5)  |
| 14.0        | 2.07(2)                          | 0 *                              | 0.000566(16)  | 0.106(15) |
| 15.0        | 1.879(14)                        | 0 *                              | 0.000322(6)   | 0.104(11) |
| 16.0        | 1.729(14)                        | 0 *                              | 0.000183(3)   | 0.086(6)  |
| 17.0        | 1.617(9)                         | 0 *                              | 0.0001073(18) | 0.080(9)  |
| 18.0        | 1.538(13)                        | 0 *                              | 0.000065(2)   | 0.078(6)  |
| 19.0        | 1.462(6)                         | 0 *                              | 0.0000383(12) | 0.084(6)  |
| 20.0        | 1.377(6)                         | 0 *                              | 0.0000241(15) | 0.0692(8) |

\* fixed at 0 emu mol<sup>-1</sup>

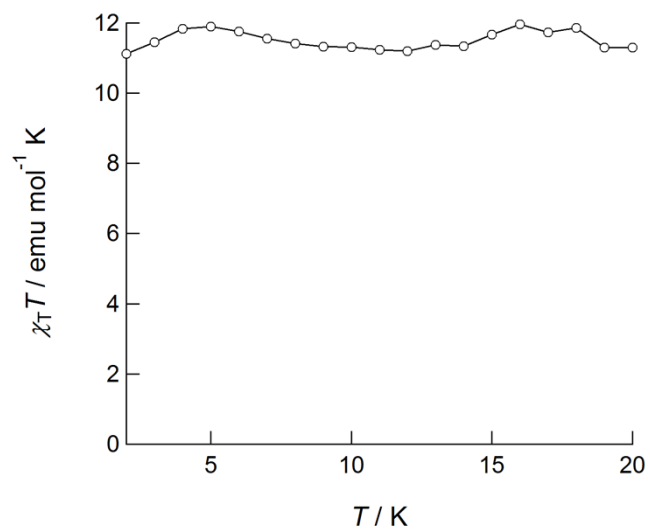

**Figure S14** Temperature dependence of the product of the isothermal susceptibility  $\chi_T$  and temperature  $T$  of **5** measured under 0 Oe dc field.

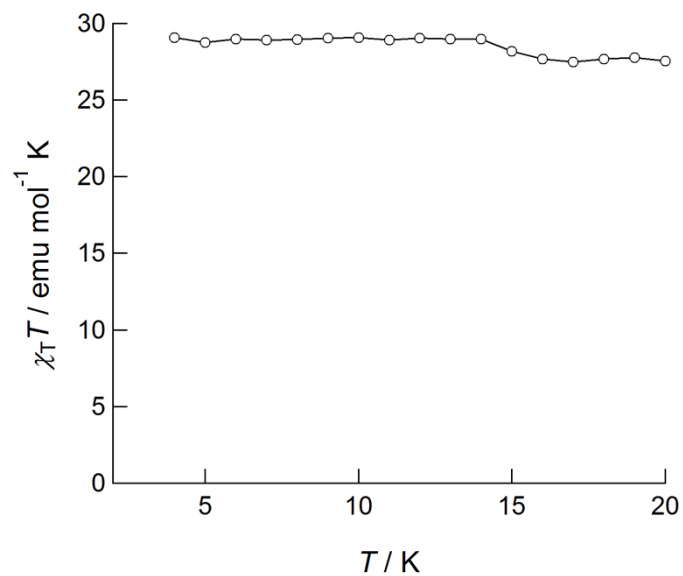

**Figure S15** Temperature dependence of the product of the isothermal susceptibility  $\chi_T$  and temperature  $T$  of **5** measured under 1000 Oe dc field.

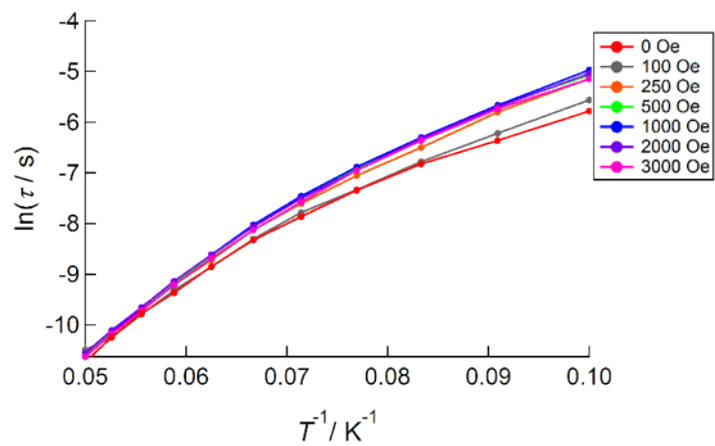

**Figure S16** Dc field dependence of the Arrhenius plots for **5** measured under dc field ranging from 0 Oe to 3000 Oe.

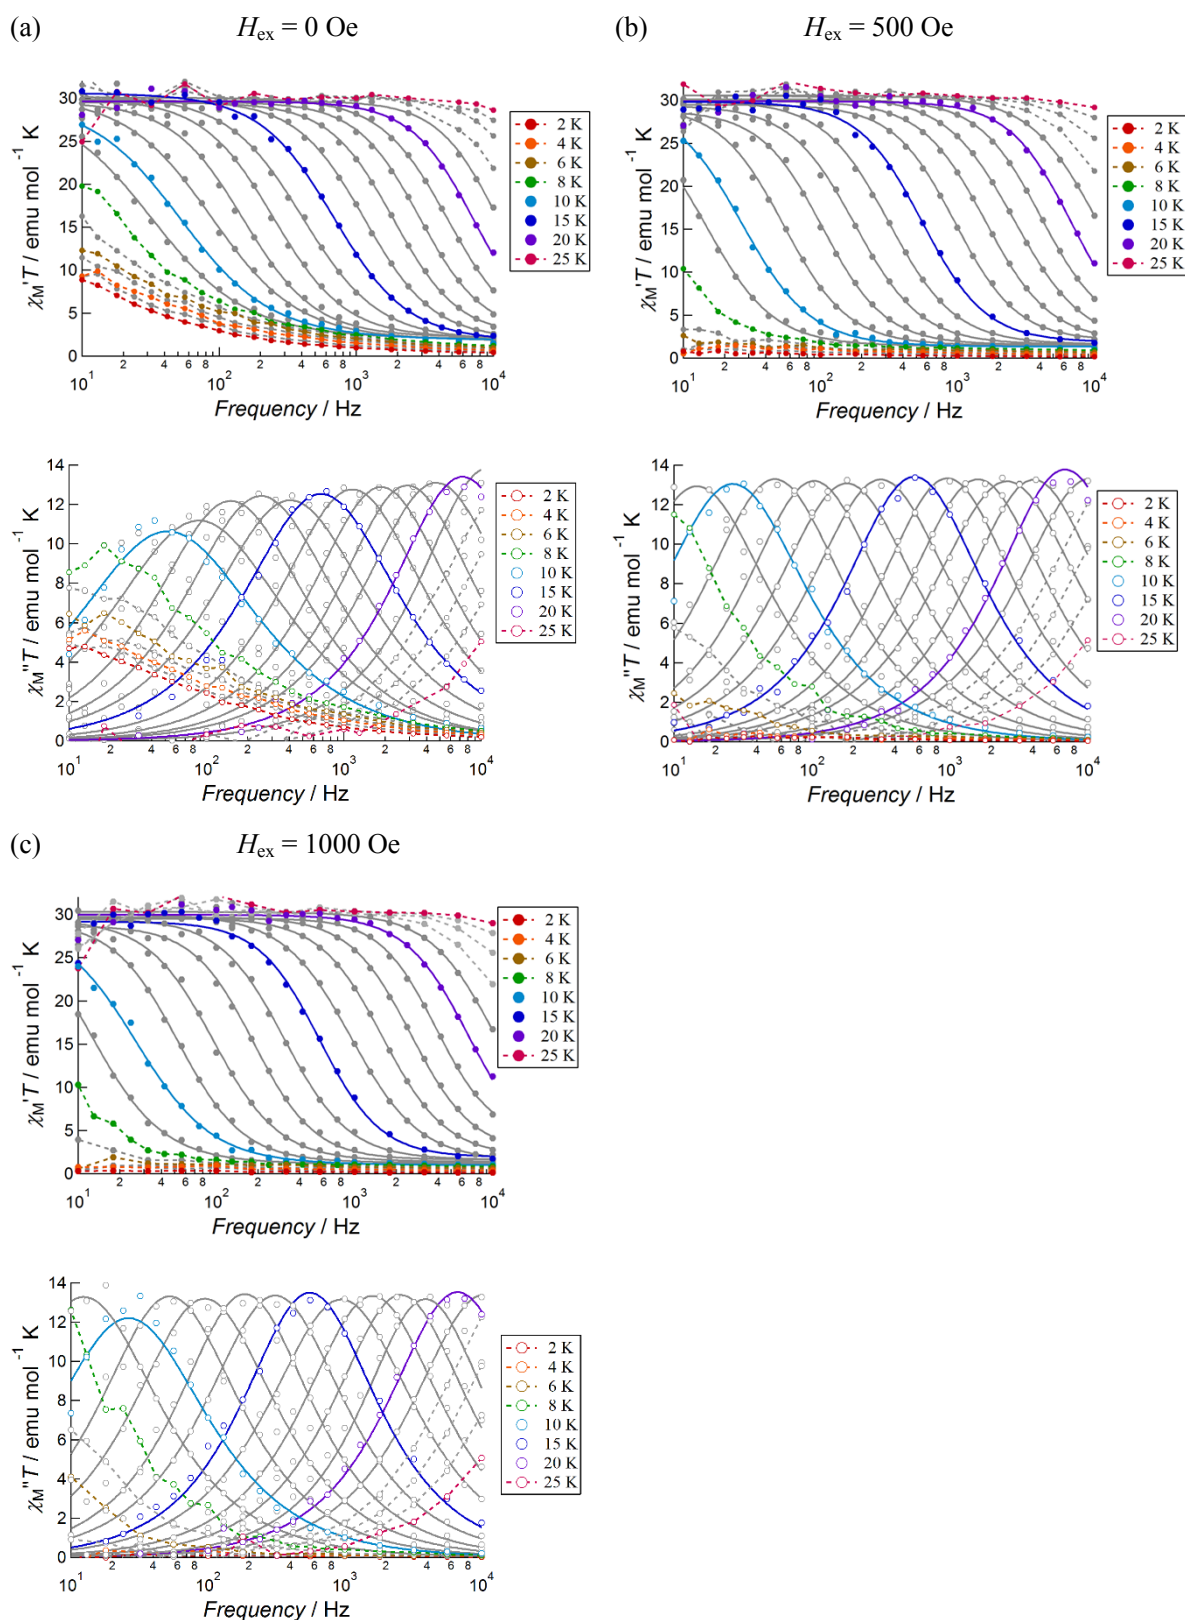

**Figure S17** Frequency dependence of the products of  $\chi_M' T$  (closed circles) and  $\chi_M'' T$  (open circles) of  $[\text{Dy}_{0.07}\text{La}_{0.93}(\text{NO}_3)\{\text{Zn}(\text{L})(\text{SCN})\}_2]$  (**5\***) in type-A structure, measured under 0-1000 Oe dc field. Solid curves represent theoretical calculations on the basis of the generalized Debye model, whereas dotted curves serve as guides for the eyes.
